# Supplementary material
Source: PubMed Central journal article supplement (PMC7544979)
Supplement: mmc1.pdf [file mmc1.pdf]

**YMTHE, Volume 28**

## **Supplemental Information**

### **Gene Therapy Intervention in Neovascular**

### **Eye Disease: A Recent Update**

**Fan-Li Lin, Peng-Yuan Wang, Yu-Fan Chuang, Jiang-Hui Wang, Vickie H.Y. Wong, Bang V. Bui, and Guei-Sheung Liu**

Status of Studies found including "Recruiting", "Not yet recruiting", "Active", "not recruiting", "Completed", "Enrolling by invitation", and "Unknown status Studies". Agents that specifically neutralising VEGF, as well as suppressing PDGF and Angiopoietins/Tie-2 were excluded. Agents that are classified as steroid, vitamin analogue, NSAID, anti-oxidant, herbal extract; daily supplementary, cell-based therapy, photodynamic therapy, or uncertain mechanism were excluded.

| Conditions     | Identifier                                                                                                                                                                       | Drug                           | Class                                                                   | Route                                                            | Type                      |
|----------------|----------------------------------------------------------------------------------------------------------------------------------------------------------------------------------|--------------------------------|-------------------------------------------------------------------------|------------------------------------------------------------------|---------------------------|
| nAMD           | NCT02022501<br>NCT02401945                                                                                                                                                       | DE-120                         | Receptor tyrosine kinase inhibitor for VEGFR/PDGFR                      | IVT                                                              | small molecule            |
| nAMD           | NCT00992563                                                                                                                                                                      | Linifanib; ABT-869; AL-39324   | Receptor tyrosine kinase inhibitor for VEGFR/FLT3/PDGFR                 | eye drop                                                         | small molecule            |
| nAMD           | NCT00138632                                                                                                                                                                      | Vatalanib; PTK787              | Receptor tyrosine kinase inhibitor for VEGFR                            | oral                                                             | small molecule            |
| nAMD; DR       | NCT03479372<br>NCT02022540<br>NCT02475109                                                                                                                                        | PAN-90806                      | Receptor tyrosine kinase inhibitor for VEGFR                            | eye drop                                                         | small molecule            |
| nAMD           | NCT03630315                                                                                                                                                                      | OTX-TKI                        | Sustained-release receptor tyrosine kinase inhibitor implants for VEGFR | IVT                                                              | small molecule            |
| nAMD           | NCT00612456<br>NCT01134055<br>NCT01154062<br>NCT00733304<br>NCT00463320<br>NCT01051700                                                                                           | Pazopanib                      | Multi-targeted receptor tyrosine kinase inhibitor including VEGFR       | eye drop/oral                                                    | small molecule            |
| nAMD; DR       | NCT00414999                                                                                                                                                                      | TG-100801                      | Kinase inhibitor for VEGFR/Src                                          | eye drop                                                         | small molecule            |
| nAMD; DME; RVO | NCT03953079<br>NCT03249740<br>NCT04085341                                                                                                                                        | Sunitinib; GB-102              | Pan receptor tyrosine kinase inhibitor                                  | IVT                                                              | small molecule            |
| nAMD           | NCT01674569<br>NCT03710863                                                                                                                                                       | CM-082; X-82                   | Receptor tyrosine kinase inhibitor for VEGFR/PDGFR/CSF1R                | oral                                                             | small molecule            |
| nAMD; DME      | NCT03835884                                                                                                                                                                      | AR-13503                       | Kinase inhibitor for Rho/PKC                                            | IVT                                                              | small molecule            |
| nAMD           | NCT02076919<br>NCT02355028                                                                                                                                                       | Acrizanib; LHA610              | VEGFR2 inhibitor                                                        | eye drop                                                         | small molecule            |
| DME            | NCT01585148<br>NCT00886808                                                                                                                                                       | iCo-007; ISIS-13650            | c-Raf kinase inhibitor                                                  | IVT                                                              | antisense oligonucleotide |
| DME            | NCT03635814                                                                                                                                                                      | Imatinib; YD312                | Tyrosine kinases inhibitor not involving VEGFR                          | oral                                                             | small molecule            |
| nAMD           | NCT02914639<br>NCT02914613                                                                                                                                                       | SF0166                         | $\alpha$ v $\beta$ integrin inhibitor                                   | eye drop                                                         | small molecule            |
| nAMD; DME; DR  | NCT01749891<br>NCT01482871<br>NCT02348918<br>NCT02435862                                                                                                                         | Risuteganib; Luminat; ALG-1001 | Integrin inhibitor                                                      | IVT                                                              | peptide                   |
| nAMD           | NCT00536016                                                                                                                                                                      | JSM6427                        | $\alpha$ 5 $\beta$ 1 integrin inhibitor                                 | IVT                                                              | small molecule            |
| nAMD           | NCT00782093                                                                                                                                                                      | Volociximab                    | $\alpha$ 5 $\beta$ 1 integrin inhibitor                                 | IVT                                                              | antibody                  |
| DME            | NCT02914613                                                                                                                                                                      | SF0166                         | $\alpha$ v $\beta$ 3 integrin inhibitor                                 | eye drop                                                         | small molecule            |
| DME; DR        | NCT03868923                                                                                                                                                                      | THR-687                        | Pan integrin inhibitor                                                  | IVT                                                              | small molecule            |
| nAMD           | NCT03814291                                                                                                                                                                      | IBI302                         | VEGF/C3b/C4b inhibitor                                                  | IVT                                                              | antibody                  |
| nAMD           | NCT01835015                                                                                                                                                                      | CLG561                         | C3 inhibitor                                                            | IVT                                                              | antibody                  |
| nAMD           | NCT01527500<br>NCT01255462<br>NCT01624636<br>NCT01535950                                                                                                                         | Tesidolumab; LFG316            | C5 inhibitor                                                            | IVT                                                              | antibody                  |
| nAMD           | NCT03362190<br>NCT00950638<br>NCT00709527                                                                                                                                        | Zimura; ARC1905                | C5 inhibitor                                                            | IVT                                                              | aptamer                   |
| nAMD           | NCT01157065<br>NCT00473928                                                                                                                                                       | POT-4; AL78898A                | C3 inhibitor                                                            | IVT                                                              | peptide                   |
| nAMD           | NCT03465709<br>NCT02461771                                                                                                                                                       | pegcetacoplan; APL-2           | C3 inhibitor                                                            | IVT                                                              | peptide                   |
| nAMD           | NCT02555306<br>NCT03211234                                                                                                                                                       | Carotuximab; DE-122            | Endoglin inhibitor                                                      | IVT                                                              | antibody                  |
| nAMD           | NCT03869684                                                                                                                                                                      | MT-0814                        | CCR3 antagonist                                                         | intraocular injection                                            | small molecule            |
| nAMD           | NCT03558061<br>NCT03558074                                                                                                                                                       | ALK4290                        | CCR3 antagonist                                                         | oral                                                             | small molecule            |
| nAMD           | NCT03633084<br>NCT04200248                                                                                                                                                       | RBM-007                        | FGF2 inhibitor                                                          | IVT                                                              | aptamer                   |
| nAMD           | NCT01033721<br>NCT01271270                                                                                                                                                       | Palomid 529                    | mTOR inhibitor                                                          | subconjunctival injection                                        | small molecule            |
| nAMD           | NCT02732899<br>NCT02357342<br>NCT00304954                                                                                                                                        | Rapamycin; Sirolimus           | mTOR inhibitor                                                          | IVT/oral                                                         | small molecule            |
| DR             | NCT00401115                                                                                                                                                                      | Rapamycin; MS-R001             | mTOR inhibitor                                                          | subconjunctival injection                                        | small molecule            |
| DME            | NCT00711490<br>NCT00656643<br>NCT00401115                                                                                                                                        | Rapamycin; Sirolimus           | mTOR inhibitor                                                          | subconjunctival injection/intraocular injection                  | small molecule            |
| nAMD           | NCT03216538                                                                                                                                                                      | AS101                          | IL-1 $\beta$ converting enzyme inhibitor                                | oral                                                             | small molecule            |
| nAMD           | NCT00503022                                                                                                                                                                      | ACZ885                         | IL-1 $\beta$ inhibitor                                                  | intravenous infusion                                             | antibody                  |
| nAMD           | NCT02358889<br>NCT01485588                                                                                                                                                       | hi-con1                        | Tissue factor inhibitor                                                 | IVT                                                              | antibody-like protein     |
| nAMD           | NCT03452527                                                                                                                                                                      | ICON-1                         | Tissue factor inhibitor                                                 | IVT                                                              | antibody-like protein     |
| nAMD           | NCT00767949<br>NCT01414153                                                                                                                                                       | Sonepizumab; IS ONEP; LT1009   | Sphingosine 1-phosphate (S1P) inhibitor                                 | IVT                                                              | antibody                  |
| nAMD; DR       | NCT00346866<br>NCT00051129<br>NCT00299507<br>NCT00058994<br>NCT00349739<br>NCT00211458<br>NCT00041483<br>NCT00569569<br>NCT00346957<br>NCT00211484<br>NCT00211419<br>NCT00211406 | Anecortave acetate             | Angiogenesis inhibitor                                                  | posterior juxtasclear depot/sub-tenon injection/sclera injection | small molecule            |
| nAMD; DR       | NCT02727881<br>NCT02511613<br>NCT01678963<br>NCT00094120<br>NCT00333476<br>NCT00139282<br>NCT00089830<br>NCT01769183                                                             | Squalamine Lactate; MSI-1256F  | Sodium-hydrogen exchanger NHE3 inhibitor                                | eye drop                                                         | small molecule            |
| nAMD; DME      | NCT00607750<br>NCT00536692                                                                                                                                                       | mecamylamine; ATG003           | Endothelial cells-nicotinic acetylcholine receptors inhibitor           | eye drop                                                         | small molecule            |
| nAMD           | NCT00446654                                                                                                                                                                      | CGC-11047                      | Anti-proliferative properties                                           | subconjunctival injections                                       | small molecule            |
| nAMD; DME      | NCT02530918                                                                                                                                                                      | DS-7080a                       | ROBO4 inhibitor                                                         | IVT                                                              | antibody                  |
| nAMD           | NCT01570790                                                                                                                                                                      | Combretastatin A-4 phosphate   | Tubulin depolymerization                                                | intravenous infusion                                             | small molecule            |
| DR             | NCT01869933                                                                                                                                                                      | OC-10X                         | Tubulin inhibitor                                                       | eye drop                                                         | small molecule            |
| nAMD, DME, RVO | NCT02867735<br>NCT03927690                                                                                                                                                       | LKA651                         | Erythropoietin inhibitor                                                | IVT                                                              | small molecule            |

**Abbreviation:**  
 CCR = CC chemokine receptor  
 CSF1R = Colony stimulating factor 1 receptor  
 DME = diabetic macular edema  
 DR = diabetic retinopathy  
 FGF2 = fibroblast growth factor  
 FLT3 = fms-like tyrosine kinase 3  
 IGF-1 = insulin-like growth factor  
 IGF-1R = insulin-like growth factor-1 receptor  
 IGFBP-3 = insulin like growth factor binding protein 3  
 IRS-1 = insulin receptor substrate 1  
 IVT = intravitreal injection  
 nAMD = neovascular age-related macular degeneration  
 PDGFR = platelet-derived growth factor receptor  
 PEDF = pigment epithelium-derived factor  
 PlGF = placental growth factor  
 PKC = protein kinase C  
 PPAR $\alpha$  = peroxisome proliferator-activated receptor alpha  
 ROBO4 = roundabout Guidance Receptor 4  
 ROP = retinopathy of prematurity  
 RVO = retinal vessel occlusion  
 VEGFR = vascular endothelial growth factor receptor

|           |                                                                                                                      |                                                 |                                                                                   |                           |                           |
|-----------|----------------------------------------------------------------------------------------------------------------------|-------------------------------------------------|-----------------------------------------------------------------------------------|---------------------------|---------------------------|
| nAMD; DR  | NCT03022318<br>NCT03023059<br>NCT02706977                                                                            | Carbidopa-levodopa                              | PEDF stimulator                                                                   | oral                      | small molecule            |
| nAMD      | NCT00304954                                                                                                          | Daclizumab                                      | CD25 inhibitor                                                                    | intravenous injection     | antibody                  |
| nAMD; DME | NCT00304954<br>NCT00695682<br>NCT00959725                                                                            | Infliximab                                      | TNF- $\alpha$ inhibitor                                                           | intravenous injection/IVT | antibody                  |
| DR        | NCT00855608                                                                                                          | Adalimumab                                      | TNF- $\alpha$ inhibitor                                                           | IVT                       | antibody                  |
| DME       | NCT03466099<br>NCT02193113                                                                                           | KVD001                                          | Plasma kallikrein inhibitor                                                       | IVT                       | small molecule            |
| DME; DR   | NCT03511898                                                                                                          | THR-149                                         | Plasma kallikrein inhibitor                                                       | IVT                       | small molecule            |
| DME       | NCT02732951                                                                                                          | BI-1026706                                      | Bradykinin B1 receptor antagonist                                                 | oral                      | NA                        |
| DME       | NCT01319487                                                                                                          | FOV2304                                         | Bradykinin B1 receptor antagonist                                                 | eye drop                  | small molecule            |
| DME; DR   | NCT00133952<br>NCT00090519<br>NCT00604383<br>NCT00266895                                                             | Ruboxistaurin; LY 33531                         | PKC $\beta$ inhibitor                                                             | oral                      | small molecule            |
| DME; DR   | NCT04187443                                                                                                          | MS-553                                          | PKC $\beta$ inhibitor                                                             | oral                      | small molecule            |
| DME; DR   | NCT03499223<br>NCT03071068                                                                                           | THR-317                                         | PIGF inhibitor                                                                    | IVT                       | antibody                  |
| DME       | NCT01506895                                                                                                          | Darapladib                                      | Lipoprotein-associated phospholipase A2 (Lp-PLA2) inhibitor                       | oral                      | small molecule            |
| DME       | NCT02302079                                                                                                          | ASP8232                                         | Vascular adhesion protein-1 (VAP-1) inhibitor                                     | oral                      | small molecule            |
| DME       | NCT02314299                                                                                                          | Elamipretide; MTP-131                           | Cardiolipin peroxidase inhibitor and mitochondria-targeting                       | eye drop                  | peptide                   |
| DME       | NCT02103283                                                                                                          | Teprotumumab                                    | IGF-1R antagonist                                                                 | intravenous infusion      | antibody                  |
| DME       | NCT02002403<br>NCT01821677                                                                                           | Danazol; DMI-5207                               | Decreasing blood vessel permeability and the formation of new leaky blood vessels | oral                      | small molecule            |
| DME       | NCT00683176                                                                                                          | Choline fenofibrate (SLV348)                    | PPAR $\alpha$ inhibitor                                                           | oral                      | small molecule            |
| DR        | NCT03439345<br>NCT01927315<br>NCT01320345                                                                            | Fenofibrate                                     | PPAR $\alpha$ inhibitor                                                           | oral                      | small molecule            |
| DME; DR   | NCT03161652                                                                                                          | Levosulpiride                                   | Dopamine D2 receptor blocker                                                      | oral                      | small molecule            |
| DME;RVO   | NCT01120899<br>NCT01468844<br>NCT01468831                                                                            | Minocycline                                     | Microglia Inhibitor                                                               | oral                      | small molecule            |
| DME       | NCT04292912                                                                                                          | GSK2798745                                      | Transient receptor potential vanilloid 4 (TRPV4) channel blocker                  | oral                      | small molecule            |
| DR        | NCT01726075                                                                                                          | Somatostatin; COLIRIOBCN070660                  | Inhibiting various hormones and growth factors secretion                          | eye drop                  | peptide                   |
| DR        | NCT03238963                                                                                                          | BI 1467335; PXS 4728A                           | Aamine oxidase copper-containing 3 (AOC3) inhibitor                               | oral                      | small molecule            |
| DR; ROP   | NCT01535495<br>NCT03038295<br>NCT03083431<br>NCT01238471<br>NCT01079715<br>NCT02977000<br>NCT02504944<br>NCT02014454 | Propranolol                                     | $\beta$ -adrenergic blocker                                                       | oral/eye drop             | small molecule            |
| ROP       | NCT01660620                                                                                                          | Betaxolol                                       | $\beta$ 1-adrenergic antagonist with no partial agonist activity                  | eye drop                  | small molecule            |
| DR        | NCT00511875                                                                                                          | Doxycycline                                     | Anti-inflammation                                                                 | oral                      | small molecule            |
| DR        | NCT00000159                                                                                                          | Sorbinil                                        | Aldose reductase inhibitor                                                        | oral                      | small molecule            |
| DR        | NCT03811561                                                                                                          | Semaqlutide                                     | GLP-1 agonist                                                                     | subcutaneous injection    | small molecule            |
| DR        | NCT04283162<br>NCT01382498                                                                                           | Calcium Dobesilate                              | Vasoprotective                                                                    | oral                      | small molecule            |
| DR        | NCT01225653<br>NCT00619034                                                                                           | Latanoprost                                     | PGF2 analogue                                                                     | eye drop                  | small molecule            |
| DR        | NCT02753400                                                                                                          | Emixustat Hydrochloride; ACU-4429               | RPE65 inhibitor                                                                   | oral                      | small molecule            |
| RVO       | NCT02947867                                                                                                          | Aganirsen; GS-101                               | Inhibiting IRS-1 mRNA expression                                                  | eye drop                  | antisense oligonucleotide |
| ROP       | NCT04191954                                                                                                          | Fasudil hydrochloride                           | Rho-associated coiled coil-forming protein kinase (ROCK) inhibitor                | eye drop                  | small molecule            |
| ROP       | NCT01096784<br>NCT03253263                                                                                           | rhiGF-I/rhiGFBP-3; SHP607; Mecasermin rinfabate | IGF-I and IGFBP-3 stimulant                                                       | intravenous infusion      | protein                   |
